# Supplementary material for: Life Cycle Assessment of an Integrated Membrane Treatment System of Anaerobic-Treated Palm Oil Mill Effluent (POME)
Source: MDPI journal article supplement (doi:10.3390/membranes12020246), 2022-02-21
Supplement: s1 [file s1]

## Supplementary material

### List of Tables

**Table S1:** Characterisation values of adsorption process integrated membrane at midpoint level.

**Table S2:** Damage assessment values of adsorption process integrated membrane at endpoint level.

**Table S3:** Characterisation values of electro-oxidation process integrated membrane at midpoint level.

**Table S4:** Damage assessment values of electro-oxidation process integrated membrane at endpoint level.

**Table S5:** Uncertainty analysis characterisation factors for adsorption-integrated membrane.

**Table S6:** Uncertainty analysis characterisation factors for electro-oxidation integrated membrane.

**Table S1.** Characterisation values of adsorption process integrated membrane at midpoint level.

| Impact category                   | Unit         | Total       | Adsorption treated anaerobic POME | Pretreated Anaerobic POME | Activated carbon, granular {GLO}  market for activated carbon, granular   APOS, U | Sodium bicarbonate {GLO}  market for sodium bicarbonate   APOS, U | EDTA, ethylenediaminetetraacetic acid {GLO}  market for   APOS, U | Ultrafiltration module {GLO}  ultrafiltration module production, hollow fiber   APOS, U | Chlorine, liquid {RoW}  market for chlorine, liquid   APOS, U | Electricity, high voltage {MY}  electricity production, hard coal   APOS, U | Electricity, high voltage {MY}  electricity production, hard coal   APOS, U | Electricity, high voltage {MY}  electricity production, hard coal   APOS, U | Spent automobile catalyst {GLO}  market for   APOS, S |
|-----------------------------------|--------------|-------------|-----------------------------------|---------------------------|-----------------------------------------------------------------------------------|-------------------------------------------------------------------|-------------------------------------------------------------------|-----------------------------------------------------------------------------------------|---------------------------------------------------------------|-----------------------------------------------------------------------------|-----------------------------------------------------------------------------|-----------------------------------------------------------------------------|-------------------------------------------------------|
| Global warming                    | kg CO2 eq    | 583.8737415 | 2.4                               | 331.932112                | 1.21016041                                                                        | 0.00457764                                                        | 0.01763618                                                        | 246.029995                                                                              | 0.000637962                                                   | 0.58587697                                                                  | 0.00526094                                                                  | 0.04184835                                                                  | 1.64563548                                            |
| Stratospheric ozone depletion     | kg CFC 11 eq | 9.89013E-05 | 0                                 | 2.447E-06                 | 2.9136E-07                                                                        | 1.5573E-09                                                        | 7.1297E-09                                                        | 9.5358E-05                                                                              | 6.42873E-10                                                   | 1.0876E-07                                                                  | 9.7658E-10                                                                  | 7.7683E-09                                                                  | 6.7782E-07                                            |
| Ionizing radiation                | kBq Co-60 eq | 15.36816348 | 0                                 | 0.02093818                | 0.04468263                                                                        | 0.00019839                                                        | 0.00086251                                                        | 15.0575024                                                                              | 5.11774E-05                                                   | 0.00093059                                                                  | 8.3564E-06                                                                  | 6.6471E-05                                                                  | 0.24292278                                            |
| Ozone formation, Human health     | kg NOx eq    | 0.655531176 | 0.28                              | 0.02540522                | 0.0027975                                                                         | 1.2693E-05                                                        | 3.4291E-05                                                        | 0.34275241                                                                              | 1.55881E-06                                                   | 0.00112913                                                                  | 1.0139E-05                                                                  | 8.0652E-05                                                                  | 0.00330758                                            |
| Fine particulate matter formation | kg PM2.5 eq  | 0.385918301 | 0.0308                            | 0.04751614                | 0.00224739                                                                        | 1.2293E-05                                                        | 2.4572E-05                                                        | 0.2998002                                                                               | 1.44813E-06                                                   | 0.00211185                                                                  | 1.8964E-05                                                                  | 0.00015085                                                                  | 0.0032346                                             |

|                                         |             |             |        |            |            |            |            |            |             |            |            |            |            |
|-----------------------------------------|-------------|-------------|--------|------------|------------|------------|------------|------------|-------------|------------|------------|------------|------------|
| Ozone formation, Terrestrial ecosystems | kg NOx eq   | 0.665968531 | 0.28   | 0.02550022 | 0.00282401 | 1.2854E-05 | 3.5592E-05 | 0.35303072 | 1.57321E-06 | 0.00113335 | 1.0177E-05 | 8.0954E-05 | 0.00333907 |
| Terrestrial acidification               | kg SO2 eq   | 0.794609808 | 0.1008 | 0.05929367 | 0.00585269 | 4.066E-05  | 5.7141E-05 | 0.61998292 | 2.37495E-06 | 0.0026353  | 2.3664E-05 | 0.00018824 | 0.00573315 |
| Freshwater eutrophication               | kg P eq     | 0.066630928 | 0      | 0.00828753 | 0.00050649 | 2.3003E-06 | 4.7495E-06 | 0.05653918 | 3.03643E-07 | 0.00036834 | 3.3075E-06 | 2.631E-05  | 0.00089242 |
| Marine eutrophication                   | kg N eq     | 0.032611137 | 0      | 0.00054406 | 3.2943E-05 | 1.6046E-07 | 1.35E-05   | 0.03193421 | 3.09644E-08 | 2.4181E-05 | 2.1713E-07 | 1.7272E-06 | 6.0107E-05 |
| Terrestrial ecotoxicity                 | kg 1,4-DCB  | 436.3164566 | 0      | 7.78153173 | 1.09186262 | 0.03968431 | 0.0592853  | 419.755916 | 0.00222832  | 0.34584899 | 0.00310558 | 0.0247035  | 7.21229034 |
| Freshwater ecotoxicity                  | kg 1,4-DCB  | 8.968749871 | 0      | 0.27450485 | 0.02181044 | 0.00067368 | 0.00091461 | 8.51437395 | 4.04944E-05 | 0.01220033 | 0.00010955 | 0.00087145 | 0.14325051 |
| Marine ecotoxicity                      | kg 1,4-DCB  | 11.88190433 | 0      | 0.38161352 | 0.02998564 | 0.00086855 | 0.00117691 | 11.2662536 | 5.25382E-05 | 0.01696075 | 0.0001523  | 0.00121148 | 0.18362902 |
| Human carcinogenic toxicity             | kg 1,4-DCB  | 7.66379871  | 0      | 0.66206999 | 0.03917139 | 0.00025116 | 0.00075338 | 6.86678445 | 2.87339E-05 | 0.0294256  | 0.00026423 | 0.00210183 | 0.06294795 |
| Human non-carcinogenic toxicity         | kg 1,4-DCB  | 197.8641758 | 0      | 12.2809097 | 0.93002878 | 0.01146186 | 0.01553772 | 181.583167 | 0.000798329 | 0.54582316 | 0.00490127 | 0.03898737 | 2.45256057 |
| Land use                                | m2a crop eq | 19.12660692 | 0      | 1.07060482 | 0.14270531 | 0.00155343 | 0.00182425 | 17.559122  | 0.000103291 | 0.04758287 | 0.00042727 | 0.00339878 | 0.29928486 |

|                           |           |             |   |            |            |            |            |            |             |            |            |            |            |
|---------------------------|-----------|-------------|---|------------|------------|------------|------------|------------|-------------|------------|------------|------------|------------|
| Mineral resource scarcity | kg Cu eq  | 0.73039155  | 0 | 0.00482751 | 0.00056382 | 9.4943E-05 | 5.9503E-05 | 0.72130853 | 2.44737E-06 | 0.00021456 | 1.9266E-06 | 1.5326E-05 | 0.00330299 |
| Fossil resource scarcity  | kg oil eq | 57.84471856 | 0 | 2.90546049 | 0.30728212 | 0.00096141 | 0.00675632 | 54.0974081 | 0.000156218 | 0.12913275 | 0.00115956 | 0.00922377 | 0.38717782 |
| Water consumption         | m3        | 2.549215272 | 0 | 0.02389905 | 0.00330096 | 0.00016186 | 0.00025038 | 2.50737444 | 1.50982E-05 | 0.00106219 | 9.538E-06  | 7.5871E-05 | 0.01306589 |

**Table S2.** Damage assessment values of adsorption process integrated membrane at endpoint level.

| Damage category | Unit            | Total       | Adsorption treated anaerobic POME | Pretreated Anaerobic POME | Activated carbon, granular {GLO}  market for activated carbon, granular   APOS, U | Sodium bicarbonate {GLO}  market for sodium bicarbonate   APOS, U | EDTA, ethylenediaminetetraacetic acid {GLO}  market for   APOS, U | Ultrafiltration module {GLO}  ultrafiltration module production, hollow fiber   APOS, U | Chlorine, liquid {RoW}   market for chlorine, liquid   APOS, U | Electricity, high voltage {MY}  electricity production, hard coal   APOS, U | Electricity, high voltage {MY}  electricity production, hard coal   APOS, U | Electricity, high voltage {MY}  electricity production, hard coal   APOS, U | Spent automobile catalyst {GLO}  market for   APOS, S |
|-----------------|-----------------|-------------|-----------------------------------|---------------------------|-----------------------------------------------------------------------------------|-------------------------------------------------------------------|-------------------------------------------------------------------|-----------------------------------------------------------------------------------------|----------------------------------------------------------------|-----------------------------------------------------------------------------|-----------------------------------------------------------------------------|-----------------------------------------------------------------------------|-------------------------------------------------------|
| Human health    | DALY            | 0.000860579 | 0.000021858                       | 0.00034342                | 2.8822E-06                                                                        | 1.5766E-08                                                        | 3.8369E-08                                                        | 0.00048576                                                                              | 1.81004E-09                                                    | 2.0973E-06                                                                  | 1.8833E-08                                                                  | 1.498E-07                                                                   | 4.3436E-06                                            |
| Ecosystems      | PDF species .yr | 2.14375E-06 | 6.42042E-08                       | 9.6105E-07                | 6.6464E-09                                                                        | 4.1475E-11                                                        | 8.9894E-11                                                        | 1.0987E-06                                                                              | 3.84901E-12                                                    | 3.0456E-09                                                                  | 2.7348E-11                                                                  | 2.1754E-10                                                                  | 9.7777E-09                                            |
| Resources       | USD2013         | 16.83327055 | 0                                 | 0.27881017                | 0.04903442                                                                        | 0.00021436                                                        | 0.00227081                                                        | 16.4095655                                                                              | 3.08489E-05                                                    | 0.01239168                                                                  | 0.00011127                                                                  | 0.00088512                                                                  | 0.07995632                                            |



**Table S3.** Characterisation values of electro-oxidation process integrated membrane at midpoint level.

| Impact category               | Unit                  | Total      | Electro-oxidation treated anaerobic POM E | Pre-treated Anaerobic POM E | Water storage {RoW}   construction   APOS, U | Epoxy resin, liquid   {RER}   market for epoxy resin, liquid   APOS, U | Chromium steel pipe {GLO}   production   APOS, U | Steel, low-alloyed {GLO}   market for   APOS, U | Ultrafiltration module {GLO}   ultrafiltration module production, hollow fiber   APOS, U | Sodium bicarbonate {GLO}   market for sodium bicarbonate   APOS, U | EDTA, ethylenediaminetetraacetic acid {GLO}   market for   APOS, U | EDTA, ethylenediaminetetraacetic acid {GLO}   market for   APOS, U | Electricity, high voltage {MY}   electricity production, hard coal   APOS, U | Electricity, high voltage {MY}   electricity production, hard coal   APOS, U | Electricity, high voltage {MY}   electricity production, hard coal   APOS, U | Electricity, high voltage {MY}   electricity production, hard coal   APOS, U |
|-------------------------------|-----------------------|------------|-------------------------------------------|-----------------------------|----------------------------------------------|------------------------------------------------------------------------|--------------------------------------------------|-------------------------------------------------|------------------------------------------------------------------------------------------|--------------------------------------------------------------------|--------------------------------------------------------------------|--------------------------------------------------------------------|------------------------------------------------------------------------------|------------------------------------------------------------------------------|------------------------------------------------------------------------------|------------------------------------------------------------------------------|
| Global warming                | kg CO <sub>2</sub> eq | 582.931213 | 0                                         | 331.932112                  | 0.0456407                                    | 0.0033036                                                              | 0.00087177                                       | 0.01695061                                      | 246.029995                                                                               | 0.00457764                                                         | 0.01763618                                                         | 0.00251945                                                         | 4.24461887                                                                   | 0.58587697                                                                   | 0.00526094                                                                   | 0.04184836                                                                   |
| Stratospheric ozone depletion | kg CFC11 eq           | 9.8738E-05 | 0                                         | 2.447E-06                   | 1.1408E-08                                   | 1.232E-09                                                              | 2.7569E-10                                       | 5.0973E-09                                      | 9.5358E-05                                                                               | 1.5573E-09                                                         | 7.1297E-09                                                         | 1.0185E-09                                                         | 7.8792E-07                                                                   | 1.0876E-07                                                                   | 9.7658E-10                                                                   | 7.7683E-09                                                                   |
| Ionizing radiation            | kBq Co-60 eq          | 15.0893681 | 0                                         | 0.02093818                  | 0.00108932                                   | 0.00022117                                                             | 3.7286E-05                                       | 0.00064813                                      | 15.0575024                                                                               | 0.00019839                                                         | 0.00086251                                                         | 0.00012322                                                         | 0.00674206                                                                   | 0.00093059                                                                   | 8.3564E-06                                                                   | 6.6471E-05                                                                   |
| Ozone formation               | kg NO                 | 0.37779922 | 0                                         | 0.02540522                  | 0.00013739                                   | 7.1367E-06                                                             | 2.3613E-06                                       | 4.2455E-05                                      | 0.34275241                                                                               | 1.2693E-05                                                         | 3.4291E-05                                                         | 4.8987E-06                                                         | 0.00818044                                                                   | 0.00112913                                                                   | 1.0139E-05                                                                   | 8.0652E-05                                                                   |

|                                                              |                       |                |   |                |                |                |                |                |                |                |            |            |                |                |                |                |
|--------------------------------------------------------------|-----------------------|----------------|---|----------------|----------------|----------------|----------------|----------------|----------------|----------------|------------|------------|----------------|----------------|----------------|----------------|
| on,<br>Human<br>health                                       | x<br>eq               |                |   |                |                |                |                |                |                |                |            |            |                |                |                |                |
| Fine<br>particul<br>ate<br>matter<br>formati<br>on           | kg<br>PM<br>2.5<br>eq | 0.365<br>05068 | 0 | 0.047<br>51614 | 6.6145<br>E-05 | 4.882<br>8E-06 | 3.118<br>E-06  | 3.804<br>7E-05 | 0.29980<br>02  | 1.2293<br>E-05 | 2.4572E-05 | 3.5103E-06 | 0.0153<br>0012 | 0.0021<br>1185 | 1.8964<br>E-05 | 0.0001<br>5085 |
| Ozone<br>formati<br>on,<br>Terrestr<br>ial<br>ecosyst<br>ems | kg<br>NO<br>x<br>eq   | 0.388<br>21559 | 0 | 0.025<br>50022 | 0.0001<br>4122 | 7.634<br>2E-06 | 2.4146<br>E-06 | 4.434<br>E-05  | 0.35303<br>072 | 1.2854<br>E-05 | 3.5592E-05 | 5.0846E-06 | 0.0082<br>1103 | 0.0011<br>3335 | 1.0177<br>E-05 | 8.0954<br>E-05 |
| Terrestr<br>ial<br>acidific<br>ation                         | kg<br>SO<br>2<br>eq   | 0.701<br>51002 | 0 | 0.059<br>29367 | 0.0001<br>2034 | 9.954<br>7E-06 | 3.5929<br>E-06 | 5.391<br>6E-05 | 0.61998<br>292 | 4.066E<br>-05  | 5.7141E-05 | 8.1629E-06 | 0.0190<br>9247 | 0.0026<br>353  | 2.3664<br>E-05 | 0.0001<br>8824 |
| Freshw<br>ater<br>eutroph<br>ication                         | kg<br>P<br>eq         | 0.067<br>92491 | 0 | 0.008<br>28753 | 1.2022<br>E-05 | 1.080<br>2E-06 | 3.2707<br>E-07 | 1.052<br>8E-05 | 0.05653<br>918 | 2.3003<br>E-06 | 4.7495E-06 | 6.785E-07  | 0.0026<br>6857 | 0.0003<br>6834 | 3.3075<br>E-06 | 2.631E<br>-05  |
| Marine<br>eutroph<br>ication                                 | kg<br>N<br>eq         | 0.032<br>69762 | 0 | 0.000<br>54406 | 1.2636<br>E-06 | 8.405<br>6E-08 | 3.1013<br>E-08 | 1.067<br>2E-06 | 0.03193<br>421 | 1.6046<br>E-07 | 1.35E-05   | 1.9285E-06 | 0.0001<br>7519 | 2.4181<br>E-05 | 2.1713<br>E-07 | 1.7272<br>E-06 |
| Terrestr<br>ial<br>ecotoxic<br>ity                           | kg<br>1,4-<br>DC<br>B | 430.9<br>16807 | 0 | 7.781<br>53175 | 0.1986<br>771  | 0.011<br>14175 | 0.0255<br>8744 | 0.157<br>21642 | 419.755<br>915 | 0.0396<br>8431 | 0.0592853  | 0.00846933 | 2.5056<br>4066 | 0.3458<br>4899 | 0.0031<br>0558 | 0.0247<br>035  |
| Freshw<br>ater                                               | kg<br>1,4-            | 8.898<br>94145 | 0 | 0.274<br>50485 | 0.0025<br>1844 | 0.000<br>18237 | 6.5962<br>E-05 | 0.004<br>00549 | 8.51437<br>393 | 0.0006<br>7368 | 0.00091461 | 0.00013066 | 0.0883<br>9012 | 0.0122<br>0033 | 0.0001<br>0955 | 0.0008<br>7145 |

|                                 |              |            |   |            |            |            |            |            |            |            |            |            |            |            |            |            |
|---------------------------------|--------------|------------|---|------------|------------|------------|------------|------------|------------|------------|------------|------------|------------|------------|------------|------------|
| ecotoxicity                     | DC B         |            |   |            |            |            |            |            |            |            |            |            |            |            |            |            |
| Marine ecotoxicity              | kg 1,4-DC B  | 11.8000305 | 0 | 0.38161353 | 0.00331443 | 0.00023069 | 9.4254E-05 | 0.00510691 | 11.2662536 | 0.00086855 | 0.00117691 | 0.00016813 | 0.12287894 | 0.01696075 | 0.0001523  | 0.00121148 |
| Human carcinogenic toxicity     | kg 1,4-DC B  | 7.79522122 | 0 | 0.66206999 | 0.00739007 | 0.00011353 | 0.00035426 | 0.01241964 | 6.86678444 | 0.00025116 | 0.00075338 | 0.00010763 | 0.21318547 | 0.0294256  | 0.00026423 | 0.00210183 |
| Human non-carcinogenic toxicity | kg 1,4-DC B  | 198.535733 | 0 | 12.2809097 | 0.04519018 | 0.00319282 | 0.00125989 | 0.0486498  | 181.583167 | 0.01146186 | 0.01553772 | 0.00221967 | 3.95443309 | 0.54582316 | 0.00490127 | 0.03898737 |
| Land use                        | m2 a crop eq | 19.0589316 | 0 | 1.07060482 | 0.02390684 | 0.00040965 | 0.00020632 | 0.00490169 | 17.5591221 | 0.00155343 | 0.00182425 | 0.00026061 | 0.34473302 | 0.04758287 | 0.00042727 | 0.00339878 |
| Mineral resource scarcity       | kg Cu eq     | 0.72992956 | 0 | 0.00482751 | 0.000942   | 1.1315E-05 | 8.8826E-05 | 0.00080218 | 0.72130853 | 9.4943E-05 | 5.9503E-05 | 8.5004E-06 | 0.00155445 | 0.00021456 | 1.9266E-06 | 1.5326E-05 |
| Fossil resource scarcity        | kg oil eq    | 58.0997194 | 0 | 2.90546049 | 0.00827338 | 0.00129343 | 0.00018913 | 0.00334221 | 54.0974081 | 0.00096141 | 0.00675632 | 0.00096519 | 0.93555359 | 0.12913275 | 0.00115956 | 0.00922377 |
| Water consumption               | m3           | 2.54117427 | 0 | 0.02389905 | 0.00043502 | 4.3468E-05 | 7.1589E-06 | 0.00012406 | 2.50737444 | 0.00016186 | 0.00025038 | 3.5769E-05 | 0.00769545 | 0.00106219 | 9.538E-06  | 7.5871E-05 |





**Table S4.** Damage assessment values of electro-oxidation process integrated membrane at endpoint level.

| Damage category | Unit           | Total      | Electro-oxidation treated anaerobic POM E | Pre-treated Anaerobic POM E | Water storage {RoW}   construction   APOS, U | Epox y resin , liquid   {RER }   market for epox y resin , liquid   APOS, U | Chromium steel pipe {GLO}   production   APOS , U | Steel, low-alloy ed {GLO}   market for   APOS, U | Ultrafiltration module {GLO}   ultrafiltration module production, hollow fiber   APOS, U | Sodium bicarbonate {GLO}   market for sodium bicarbonate   APOS , U | EDTA, ethylenediamine tetraacetic acid {GLO}   market for   APOS, U | EDTA, ethylenediamine tetraacetic acid {GLO}   market for   APOS, U | Electricity, high voltage {MY}   electricity production, hard coal   APOS , U | Electricity, high voltage {MY}   electricity production, hard coal   APOS , U | Electricity, high voltage {MY}   electricity production, hard coal   APOS , U | Electricity, high voltage {MY}   electricity production, hard coal   APOS , U |
|-----------------|----------------|------------|-------------------------------------------|-----------------------------|----------------------------------------------|-----------------------------------------------------------------------------|---------------------------------------------------|--------------------------------------------------|------------------------------------------------------------------------------------------|---------------------------------------------------------------------|---------------------------------------------------------------------|---------------------------------------------------------------------|-------------------------------------------------------------------------------|-------------------------------------------------------------------------------|-------------------------------------------------------------------------------|-------------------------------------------------------------------------------|
| Human health    | DALY           | 0.00084472 | -2.1978E-06                               | 0.00034342                  | 1.1944E-07                                   | 7.3266E-09                                                                  | 4.2451E-09                                        | 9.2026E-08                                       | 0.00048576                                                                               | 1.5766E-08                                                          | 3.8369E-08                                                          | 5.4813E-09                                                          | 1.5194E-05                                                                    | 2.0973E-06                                                                    | 1.8833E-08                                                                    | 1.498E-07                                                                     |
| Ecosystems      | PDF species.yr | 2.0754E-06 | -1.0375E-08                               | 9.6105E-07                  | 3.9995E-10                                   | 1.747E-11                                                                   | 5.9789E-12                                        | 1.2083E-10                                       | 1.0987E-06                                                                               | 4.1475E-11                                                          | 8.9894E-11                                                          | 1.2842E-11                                                          | 2.2065E-08                                                                    | 3.0456E-09                                                                    | 2.7348E-11                                                                    | 2.1754E-10                                                                    |
| Resources       | USD 2013       | 16.7983461 | 0                                         | 0.27881017                  | 0.00263423                                   | 0.0004274                                                                   | 6.15E-05                                          | 0.00087315                                       | 16.4095656                                                                               | 0.00021436                                                          | 0.00227081                                                          | 0.0003244                                                           | 0.08977642                                                                    | 0.01239168                                                                    | 0.00011127                                                                    | 0.00088512                                                                    |

**Table S7.** Uncertainty analysis characterisation factors for adsorption-integrated membrane.

| Impact category                         | Unit                     | Mean       | Median     | SD         | CV         | 2.5%       | 97.5%      | SEM        |
|-----------------------------------------|--------------------------|------------|------------|------------|------------|------------|------------|------------|
| Global warming                          | kg CO <sub>2</sub> eq    | 583.367871 | 580.917583 | 24.4477779 | 4.19079951 | 543.023201 | 636.972507 | 0.77310662 |
| Stratospheric ozone depletion           | kg CFC11 eq              | 9.8293E-05 | 9.7182E-05 | 1.2871E-05 | 13.095062  | 7.7052E-05 | 0.00012678 | 4.0703E-07 |
| Ionizing radiation                      | kBq Co-60 eq             | 15.8233735 | 8.68691082 | 21.4248999 | 135.40033  | 2.0730122  | 72.8253376 | 0.67751482 |
| Ozone formation, Human health           | kg NO <sub>x</sub> eq    | 0.65335502 | 0.65012081 | 0.03488505 | 5.33937116 | 0.59484801 | 0.72965731 | 0.00110316 |
| Fine particulate matter formation       | kg PM <sub>2.5</sub> eq  | 0.38399881 | 0.37896091 | 0.03794499 | 9.88153978 | 0.32462102 | 0.46810891 | 0.00119993 |
| Ozone formation, Terrestrial ecosystems | kg NO <sub>x</sub> eq    | 0.66378212 | 0.66066092 | 0.03552691 | 5.352195   | 0.60438042 | 0.74258494 | 0.00112346 |
| Terrestrial acidification               | kg SO <sub>2</sub> eq    | 0.79028208 | 0.77746676 | 0.0863845  | 10.9308436 | 0.65719435 | 0.99072199 | 0.00273172 |
| Freshwater eutrophication               | kg P eq                  | 0.06509487 | 0.05813612 | 0.03109714 | 47.7720385 | 0.02935041 | 0.14693006 | 0.00098338 |
| Freshwater ecotoxicity                  | kg 1,4-DCB               | 8.8672656  | 8.45634995 | 2.31525358 | 26.1101187 | 5.77177313 | 14.7899254 | 0.07321475 |
| Marine eutrophication                   | kg N eq                  | 0.03252974 | 0.03247775 | 0.00173231 | 5.32530788 | 0.02921748 | 0.03617762 | 5.478E-05  |
| Terrestrial ecotoxicity                 | kg 1,4-DCB               | 428.661938 | 390.387888 | 174.545477 | 40.7186787 | 259.063315 | 804.222208 | 5.51961263 |
| Human carcinogenic toxicity             | kg 1,4-DCB               | 8.02472254 | 6.06037226 | 10.2088543 | 127.217537 | 3.74528413 | 23.9243776 | 0.32283232 |
| Human non-carcinogenic toxicity         | kg 1,4-DCB               | 193.46277  | 180.746893 | 58.9425631 | 30.4671348 | 122.500603 | 341.479359 | 1.8639275  |
| Land use                                | m <sup>2</sup> a crop eq | 19.1000329 | 18.1590954 | 5.0848691  | 26.6223055 | 11.7863771 | 31.239945  | 0.16079768 |
| Marine ecotoxicity                      | kg 1,4-DCB               | 11.7467508 | 11.2112855 | 3.02589874 | 25.7594529 | 7.63622452 | 19.7273611 | 0.09568732 |
| Mineral resource scarcity               | kg Cu eq                 | 0.72150046 | 0.68965984 | 0.17388995 | 24.1011557 | 0.46835566 | 1.15428693 | 0.00549888 |
| Fossil resource scarcity                | kg oil eq                | 57.6514577 | 57.2813474 | 4.71614178 | 8.18043806 | 49.7326259 | 68.2792121 | 0.1491375  |
| Water consumption                       | m <sup>3</sup>           | 3.35032523 | 5.98167479 | 35.5564632 | 1061.28393 | -70.70422  | 64.830888  | 1.12439409 |

**Table S8.** Uncertainty analysis characterisation factors for electro-oxidation integrated membrane.

| Impact category                         | Unit                     | Mean       | Median     | SD         | CV         | 2.5%       | 97.5%      | SEM        |
|-----------------------------------------|--------------------------|------------|------------|------------|------------|------------|------------|------------|
| Global warming                          | kg CO <sub>2</sub> eq    | 584.714947 | 581.773908 | 25.5413755 | 4.36817558 | 544.510098 | 644.704718 | 0.80768921 |
| Stratospheric ozone depletion           | kg CFC11 eq              | 9.9069E-05 | 9.7814E-05 | 1.285E-05  | 12.9704619 | 7.6656E-05 | 0.00012652 | 4.0634E-07 |
| Ionizing radiation                      | kBq Co-60 eq             | 15.8720402 | 8.77767541 | 19.4189313 | 122.346787 | 1.72529522 | 75.7273386 | 0.61408053 |
| Ozone formation, Human health           | kg NO <sub>x</sub> eq    | 0.37922882 | 0.37546649 | 0.03601312 | 9.49640826 | 0.31929002 | 0.45966541 | 0.00113883 |
| Fine particulate matter formation       | kg PM <sub>2.5</sub> eq  | 0.36684392 | 0.3632343  | 0.03808109 | 10.3807336 | 0.30129128 | 0.45927495 | 0.00120423 |
| Ozone formation, Terrestrial ecosystems | kg NO <sub>x</sub> eq    | 0.38968661 | 0.38563692 | 0.03665785 | 9.40700762 | 0.32883326 | 0.47158419 | 0.00115922 |
| Terrestrial acidification               | kg SO <sub>2</sub> eq    | 0.70524795 | 0.69402731 | 0.08878963 | 12.5898458 | 0.55889167 | 0.92766633 | 0.00280777 |
| Freshwater eutrophication               | kg P eq                  | 0.06782316 | 0.06106219 | 0.03237621 | 47.7362059 | 0.0270261  | 0.15528067 | 0.00102383 |
| Marine eutrophication                   | kg N eq                  | 0.03275906 | 0.0327097  | 0.00166294 | 5.07626926 | 0.02961166 | 0.03599552 | 5.2587E-05 |
| Terrestrial ecotoxicity                 | kg 1,4-DCB               | 440.785099 | 392.792925 | 188.433244 | 42.7494588 | 256.073768 | 936.687305 | 5.95878239 |
| Freshwater ecotoxicity                  | kg 1,4-DCB               | 9.0035229  | 8.45925312 | 2.53665983 | 28.174081  | 5.52453187 | 15.5226611 | 0.08021623 |
| Marine ecotoxicity                      | kg 1,4-DCB               | 11.9303953 | 11.246475  | 3.31142155 | 27.7561763 | 7.3800956  | 20.5527245 | 0.10471634 |
| Human carcinogenic toxicity             | kg 1,4-DCB               | 7.85436418 | 6.10742792 | 8.04336819 | 102.406357 | 3.82596706 | 21.9892197 | 0.25435364 |
| Human non-carcinogenic toxicity         | kg 1,4-DCB               | 199.436202 | 184.780073 | 66.7063955 | 33.4474858 | 120.946063 | 360.93625  | 2.10944144 |
| Land use                                | m <sup>2</sup> a crop eq | 19.1828331 | 18.4041192 | 4.91851495 | 25.6401905 | 12.1267303 | 30.450068  | 0.1555371  |
| Mineral resource scarcity               | kg Cu eq                 | 0.74213165 | 0.71407882 | 0.1805971  | 24.3349146 | 0.46303946 | 1.17062387 | 0.00571098 |
| Fossil resource scarcity                | kg oil eq                | 58.5141493 | 58.2226253 | 4.78051177 | 8.16983897 | 50.2578551 | 69.4762084 | 0.15117306 |
| Water consumption                       | m <sup>3</sup>           | 2.84535782 | 4.45484355 | 35.1041246 | 1233.73322 | -67.863748 | 73.2522273 | 1.11008989 |
